# Supplementary material
Source: HighWire-hosted journal article supplement (https://bmjopen.bmj.com/content/12/2/e054830)
Supplement: inline-supplementary-material-1 [file inline-supplementary-material-1.pdf]

Search date: 01/01/2018 to 11/01/2021

**MEDLINE**

Host: PubMed

|    |                                                                                                                                          |                    |
|----|------------------------------------------------------------------------------------------------------------------------------------------|--------------------|
| 1  | Stress Disorders, Post-Traumatic[MeSH Terms]                                                                                             | MeSH               |
| 2  | (PTSD OR "acute stress disorder*" OR "combat disorder*" OR "war neuros*")                                                                | All fields         |
| 3  | ((acute OR traumatic) AND stress*) AND (expos* OR psyc*)                                                                                 | All fields         |
| 4  | (posttrauma* or post-trauma* or "post trauma*") AND (stress* or disorder* or psych* or symptom?)                                         | All fields         |
| 5  | "traumatised victim" OR "traumatized victim" OR "traumatised victim" OR "traumatised survivor" OR "traumatized survivor"                 | All fields         |
| 6  | trauma* AND (event or memor* or flashback* or nightmare)                                                                                 | All fields         |
| 7  | ((trauma* or posttrauma* or post-trauma* or victim* or survivor?) AND (exposure AND (therap* or psychotherap* or training or counsel*))) | All fields         |
| 8  | crisis intervention[MeSH Terms]                                                                                                          | MeSH               |
| 9  | ("critical incident" AND (stress or debrief* or de-brief))                                                                               | All fields         |
| 10 | debrief* or de-brief*                                                                                                                    | Title              |
| 11 | "crisis intervention" or CISD                                                                                                            | All fields         |
| 12 | ((stress or group* or psychological or crisis) AND (debrief* or de-brief*))                                                              | All fields         |
| 13 | (trauma* AND (event or memor* or flashback* or nightmare))                                                                               | All fields         |
| 14 | EMDR or "eye movement desensitisation and reprocessing" or "eye movement desensitization and reprocessing"                               | All fields         |
| 15 | (1 or 2 or 3 or 4 or 5 or 6 or 7 or 8 or 9 or 10 or 11 or 12 or 13)                                                                      |                    |
| 16 | "randomized controlled trial"                                                                                                            | Publication type   |
| 17 | "controlled clinical trial"                                                                                                              | Publication type   |
| 18 | randomized or randomised                                                                                                                 | Title/<br>abstract |
| 19 | placebo                                                                                                                                  | Title/<br>abstract |
| 20 | Randomly or random                                                                                                                       | All fields         |
| 21 | trial                                                                                                                                    | Title<br>abstract  |

|    |                                                |  |
|----|------------------------------------------------|--|
| 22 | 15 or 16 or 17 or 18 or 19 or 20 or 21         |  |
| 23 | 14 and 22                                      |  |
| 24 | Publication date from 2018/01/01 to 2019/12/31 |  |

**Embase**

Publication year: 2018; 2019

Source: Embase

|     |                                                                                                                                                                                                                                 |
|-----|---------------------------------------------------------------------------------------------------------------------------------------------------------------------------------------------------------------------------------|
| 1   | ('posttraumatic stress disorder'/exp OR 'psychotrauma'/exp OR 'acute stress disorder'/exp)                                                                                                                                      |
| 2   | (PTSD OR "acute stress disorder*" OR "combat disorder*" OR "war neuros*"):ti,ab,kw                                                                                                                                              |
| 3   | ((acute OR traumatic) AND stress*) AND (expos* OR psyc*):ti,ab,kw                                                                                                                                                               |
| 4   | ((posttrauma* or post-trauma* or "post trauma*") AND (stress* or disorder* or psych* or symptom?))                                                                                                                              |
| 5   | "traumatised victim" OR "traumatized victim" OR "traumatised victim" OR "traumatised survivor" OR "traumatized survivor"                                                                                                        |
|     | trauma* AND (event? or memor* or flashback* or nightmare?)                                                                                                                                                                      |
| 7   | EMDR or "eye movement desensiti#ation and reprocessing"                                                                                                                                                                         |
| 8   | (trauma*:ti,ab,kw OR posttrauma*:ti,ab,kw OR 'post trauma*:ti,ab,kw OR victim*:ti,ab,kw OR survivor?:ti,ab,kw) AND exposure:ti,ab,kw AND (therap*:ti,ab,kw OR psychotherap*:ti,ab,kw OR training:ti,ab,kw OR counsel*:ti,ab,kw) |
| 9   | ("critical incident" AND (stress or debrief* or de-brief)):ti,ab,kw                                                                                                                                                             |
| 10  | (debriefing or de-briefing):ti,ab,kw                                                                                                                                                                                            |
| 11  | ("crisis intervention?" OR CISD):ti,ab,kw                                                                                                                                                                                       |
| 12  | (stress:ti,ab,kw OR group?:ti,ab,kw OR psychological:ti,ab,kw OR crisis:ti,ab,kw) AND (debrief*:ti,ab,kw OR 'de brief*:ti,ab,kw)                                                                                                |
| 13  | trauma* AND (event? OR memor* OR flashback* OR nightmare?):ti,ab,kw                                                                                                                                                             |
| 14  | #1 OR #2 OR #3 OR #4 OR #5 OR #6 OR #7 OR #8 OR #9 OR #10 OR #11 OR #12 OR #13                                                                                                                                                  |
| AND |                                                                                                                                                                                                                                 |
| 15  | 'crossover procedure':de OR 'double-blind procedure':de OR 'randomized controlled trial':de OR 'single-blind procedure':de OR (random* OR factorial*                                                                            |

|    |                                                                                                                                                |
|----|------------------------------------------------------------------------------------------------------------------------------------------------|
|    | OR crossover* OR cross NEXT/1 over* OR placebo* OR doubl* NEAR/1 blind* OR singl* NEAR/1 blind* OR assign* OR allocat* OR volunteer*):de,ab,ti |
| 16 | #14 AND #15                                                                                                                                    |
| 17 | #16 AND (2018:py OR 2019:py)                                                                                                                   |
| 18 | #16 AND (2018:py OR 2019:py) AND [embase]/lim                                                                                                  |

**CENTRAL (trials)**

Host: Cochrane library

Content type: trials

|    |                                                                                                                                                                            |
|----|----------------------------------------------------------------------------------------------------------------------------------------------------------------------------|
| 1  | MeSH descriptor: [Stress Disorders, Post-Traumatic] this term only                                                                                                         |
| 2  | MeSH descriptor: [Crisis Intervention] this term only                                                                                                                      |
| 3  | (PTSD or ((posttrauma* or post-trauma* or post trauma*) near/3 (stress* or disorder* or psych* or symptom*)) or acute stress disorder* or combat disorder* or war neuros*) |
| 4  | ((((acute or traumatic) near/1 stress*) and (expos* or psyc*))                                                                                                             |
| 5  | (traumatized near/1 (victim* or survivor*))                                                                                                                                |
| 6  | (traumatized near/1 (victim* or survivor*))                                                                                                                                |
| 7  | (trauma* near/2 (event* or memor* or flashback* or nightmare*))                                                                                                            |
| 8  | ((trauma* or posttrauma* or post-trauma* or victim* or survivor*) and (exposure near/3 (therap* or psychotherap* or training or counsel*)))                                |
| 9  | (critical incident near/1 (stress or debrief* or de-brief*))                                                                                                               |
| 10 | (debriefing or de-briefing)                                                                                                                                                |
| 11 | ("crisis intervention*" or CISD)                                                                                                                                           |
| 12 | ((stress or group* or psychological or crisis) near/3 (debrief* or de-brief*))                                                                                             |
| 13 | (trauma* near/2 (event* or memor* or flashback* or nightmare*))                                                                                                            |
| 14 | (EMDR or "eye movement desensitization and reprocessing")                                                                                                                  |
| 15 | (EMDR or "eye movement desensitisation and reprocessing")                                                                                                                  |
| 16 | (#1 or #2 or #3 or #4 or #5 or #6 or #7 or #8 or #9 or #10 or #11 or #12 or #13 or #14 or #15)                                                                             |

**PsycINFO**

Host: Ebscohost

|   |                                                                                                                                                                                                                                                                                                                                                         |
|---|---------------------------------------------------------------------------------------------------------------------------------------------------------------------------------------------------------------------------------------------------------------------------------------------------------------------------------------------------------|
| 1 | (DE "Posttraumatic Stress Disorder" OR DE "Complex PTSD" OR DE "DESNOS" OR DE "Acute Stress Disorder" OR DE "Combat Experience" OR DE "Debriefing (Psychological)" OR DE "Emotional Trauma" OR DE "Post-Traumatic Stress" OR DE "Stress Reactions" OR DE "Compassion Fatigue" OR DE "Traumatic Neurosis") OR (DE "Disasters" OR DE "Natural Disasters") |
| 2 | (PTSD or ((posttrauma* or post-trauma* or post trauma*) adj3 (stress* or disorder* or psych* or symptom?)) or acute stress disorder* or combat disorder* or war neuros*)                                                                                                                                                                                |
| 3 | ((((acute or traumatic) adj stress*) and (expos* or psyc*))                                                                                                                                                                                                                                                                                             |
| 4 | (traumatized adj (victim? or survivor?))                                                                                                                                                                                                                                                                                                                |

|    |                                                                                                                                                                                                                                                                                                                                                                                                                                                                                                                                                                                                                                                                                                                                                                                                                                                                                                                                                                                                                                                                                                                                                                                                                                                                                            |
|----|--------------------------------------------------------------------------------------------------------------------------------------------------------------------------------------------------------------------------------------------------------------------------------------------------------------------------------------------------------------------------------------------------------------------------------------------------------------------------------------------------------------------------------------------------------------------------------------------------------------------------------------------------------------------------------------------------------------------------------------------------------------------------------------------------------------------------------------------------------------------------------------------------------------------------------------------------------------------------------------------------------------------------------------------------------------------------------------------------------------------------------------------------------------------------------------------------------------------------------------------------------------------------------------------|
| 5  | (trauma* adj2 (event? or memor* or flashback* or nightmare?))                                                                                                                                                                                                                                                                                                                                                                                                                                                                                                                                                                                                                                                                                                                                                                                                                                                                                                                                                                                                                                                                                                                                                                                                                              |
| 6  | (EMDR or (eye movement desensiti#ation and reprocessing))                                                                                                                                                                                                                                                                                                                                                                                                                                                                                                                                                                                                                                                                                                                                                                                                                                                                                                                                                                                                                                                                                                                                                                                                                                  |
| 7  | ((trauma* or posttrauma* or post-trauma* or victim* or survivor?) and (exposure adj3 (therap* or psychotherap* or training or counsel*)))                                                                                                                                                                                                                                                                                                                                                                                                                                                                                                                                                                                                                                                                                                                                                                                                                                                                                                                                                                                                                                                                                                                                                  |
| 8  | DE "crisis intervention"                                                                                                                                                                                                                                                                                                                                                                                                                                                                                                                                                                                                                                                                                                                                                                                                                                                                                                                                                                                                                                                                                                                                                                                                                                                                   |
| 9  | (critical incident adj (stress or debrief* or de-brief*))                                                                                                                                                                                                                                                                                                                                                                                                                                                                                                                                                                                                                                                                                                                                                                                                                                                                                                                                                                                                                                                                                                                                                                                                                                  |
| 10 | (debriefing or de-briefing) or (crisis intervention? or CISD)                                                                                                                                                                                                                                                                                                                                                                                                                                                                                                                                                                                                                                                                                                                                                                                                                                                                                                                                                                                                                                                                                                                                                                                                                              |
| 11 | ((stress or group? or psychological or crisis) adj3 (debrief* or de-brief*))                                                                                                                                                                                                                                                                                                                                                                                                                                                                                                                                                                                                                                                                                                                                                                                                                                                                                                                                                                                                                                                                                                                                                                                                               |
| 12 | (trauma* adj2 (event? or memor* or flashback* or nightmare?))                                                                                                                                                                                                                                                                                                                                                                                                                                                                                                                                                                                                                                                                                                                                                                                                                                                                                                                                                                                                                                                                                                                                                                                                                              |
| 13 | ( ( DE "Posttraumatic Stress Disorder" OR DE "Complex PTSD" OR DE "DESNOS" OR DE "Acute Stress Disorder" OR DE "Combat Experience" OR DE "Debriefing (Psychological)" OR DE "Emotional Trauma" OR DE "Post-Traumatic Stress" OR DE "Stress Reactions" OR DE "Compassion Fatigue" OR DE "Traumatic Neurosis") OR ( DE "Disasters" OR DE "Natural Disasters") ) OR TX ( ( PTSD or ((posttrauma* or post-trauma* or post trauma*) adj3 (stress* or disorder* or psych* or symptom?)) or acute stress disorder* or combat disorder* or war neuros* ) OR TX ( ((acute or traumatic) adj stress*) and (expos* or psyc*) ) OR TX ( (traumati#ed adj (victim? or survivor?)) ) OR ( (trauma* adj2 (event? or memor* or flashback* or nightmare?)) ) OR ( (EMDR or (eye movement desensiti#ation and reprocessing)) ) OR ( ((trauma* or posttrauma* or post-trauma* or victim* or survivor?) and (exposure adj3 (therap* or psychotherap* or training or counsel*))) ) OR DE "crisis intervention" OR ( (critical incident adj (stress or debrief* or de-brief*)) ) OR ( (debriefing or de-briefing) or (crisis intervention? or CISD) ) OR ( ((stress or group? or psychological or crisis) adj3 (debrief* or de-brief*)) ) OR ( (trauma* adj2 (event? or memor* or flashback* or nightmare?)) ) ) |
| 15 | "clinical trials"                                                                                                                                                                                                                                                                                                                                                                                                                                                                                                                                                                                                                                                                                                                                                                                                                                                                                                                                                                                                                                                                                                                                                                                                                                                                          |
| 16 | (randomi#ed or randomi#ation or randomi#ing)                                                                                                                                                                                                                                                                                                                                                                                                                                                                                                                                                                                                                                                                                                                                                                                                                                                                                                                                                                                                                                                                                                                                                                                                                                               |
| 17 | (RCT or at random or (random* adj3 (assign* or allocat* or control* or crossover or cross-over or design* or divide* or division or number)))                                                                                                                                                                                                                                                                                                                                                                                                                                                                                                                                                                                                                                                                                                                                                                                                                                                                                                                                                                                                                                                                                                                                              |
| 18 | (control* and (trial or study or group) and (placebo or waitlist* or wait* list* or ((treatment or care) adj2 usual)))                                                                                                                                                                                                                                                                                                                                                                                                                                                                                                                                                                                                                                                                                                                                                                                                                                                                                                                                                                                                                                                                                                                                                                     |
| 19 | ((single or double or triple or treble) adj2 (blind* or mask* or dummy))                                                                                                                                                                                                                                                                                                                                                                                                                                                                                                                                                                                                                                                                                                                                                                                                                                                                                                                                                                                                                                                                                                                                                                                                                   |
| 20 | Trial                                                                                                                                                                                                                                                                                                                                                                                                                                                                                                                                                                                                                                                                                                                                                                                                                                                                                                                                                                                                                                                                                                                                                                                                                                                                                      |
| 21 | placebo                                                                                                                                                                                                                                                                                                                                                                                                                                                                                                                                                                                                                                                                                                                                                                                                                                                                                                                                                                                                                                                                                                                                                                                                                                                                                    |
| 22 | "treatment outcome"                                                                                                                                                                                                                                                                                                                                                                                                                                                                                                                                                                                                                                                                                                                                                                                                                                                                                                                                                                                                                                                                                                                                                                                                                                                                        |
| 23 | "treatment effectiveness evaluation"                                                                                                                                                                                                                                                                                                                                                                                                                                                                                                                                                                                                                                                                                                                                                                                                                                                                                                                                                                                                                                                                                                                                                                                                                                                       |
| 24 | "mental health program evaluation"                                                                                                                                                                                                                                                                                                                                                                                                                                                                                                                                                                                                                                                                                                                                                                                                                                                                                                                                                                                                                                                                                                                                                                                                                                                         |
| 25 | "clinical trials" OR ( ( randomi#ed or randomi#ation or randomi#ing ) OR ( (RCT or at random or (random* adj3 (assign* or allocat* or control* or crossover or cross-over or design* or divide* or division or number))) ) OR ( (control* and (trial or study or group) and (placebo or waitlist* or wait* list* or ((treatment or care) adj2 usual))) ) OR ( ((single or double or triple or treble) adj2 (blind* or mask* or dummy)) ) OR TI trial OR placebo OR "treatment outcome" OR "treatment effectiveness evaluation" OR "mental health program evaluation"                                                                                                                                                                                                                                                                                                                                                                                                                                                                                                                                                                                                                                                                                                                       |
|    | ( ( DE "Posttraumatic Stress Disorder" OR DE "Complex PTSD" OR DE "DESNOS" OR DE "Acute Stress Disorder" OR DE "Combat Experience" OR DE "Debriefing (Psychological)" OR DE "Emotional Trauma" OR DE "Post-Traumatic Stress" OR DE "Stress Reactions" OR DE "Compassion Fatigue" OR DE "Traumatic                                                                                                                                                                                                                                                                                                                                                                                                                                                                                                                                                                                                                                                                                                                                                                                                                                                                                                                                                                                          |

|  |                                                                                                                                                                                                                                                                                                                                                                                                                                                                                                                                                                                                                                                                                                                                                                                                                                                                                                                                                                                                                                                                                                                                                                                                                                                                                                                                                                                                                                                                                                                                                                          |
|--|--------------------------------------------------------------------------------------------------------------------------------------------------------------------------------------------------------------------------------------------------------------------------------------------------------------------------------------------------------------------------------------------------------------------------------------------------------------------------------------------------------------------------------------------------------------------------------------------------------------------------------------------------------------------------------------------------------------------------------------------------------------------------------------------------------------------------------------------------------------------------------------------------------------------------------------------------------------------------------------------------------------------------------------------------------------------------------------------------------------------------------------------------------------------------------------------------------------------------------------------------------------------------------------------------------------------------------------------------------------------------------------------------------------------------------------------------------------------------------------------------------------------------------------------------------------------------|
|  | Neurosis") OR (DE "Disasters" OR DE "Natural Disasters") ) OR TX ( (PTSD or ((posttrauma* or post-trauma* or post trauma*) adj3 (stress* or disorder* or psych* or symptom?)) or acute stress disorder* or combat disorder* or war neuros*) ) OR TX ( (((acute or traumatic) adj stress*) and (expos* or psyc*)) ) OR TX ( (traumatise#ed adj (victim? or survivor?)) ) OR ( (trauma* adj2 (event? or memor* or flashback* or nightmare?)) ) OR ( (EMDR or (eye movement desensiti#ation and reprocessing)) ) OR ( ((trauma* or posttrauma* or post-trauma* or victim* or survivor?) and (exposure adj3 (therap* or psychotherap* or training or counsel*))) ) OR DE "crisis intervention" OR ( (critical incident adj (stress or debrief* or de-brief*)) ) OR ( (debriefing or de-briefing) or (crisis intervention? or CISD) ) OR ( ((stress or group? or psychological or crisis) adj3 (debrief* or de-brief*)) ) OR ( (trauma* adj2 (event? or memor* or flashback* or nightmare?)) ) ) AND ( "clinical trials" OR ( (randomi#ed or randomi#ation or randomi#ing) ) OR ( (RCT or at random or (random* adj3 (assign* or allocat* or control* or crossover or cross-over or design* or divide* or division or number))) ) OR ( (control* and (trial or study or group) and (placebo or waitlist* or wait* list* or ((treatment or care) adj2 usual))) ) OR ( ((single or double or triple or treble) adj2 (blind* or mask* or dummy)) ) OR TI trial OR placebo OR "treatment outcome" OR "treatment effectiveness evaluation" OR "mental health program evaluation" ) |
|  | Limiter<br>Publication year 2018-2019                                                                                                                                                                                                                                                                                                                                                                                                                                                                                                                                                                                                                                                                                                                                                                                                                                                                                                                                                                                                                                                                                                                                                                                                                                                                                                                                                                                                                                                                                                                                    |

### PTSDpubs Database

Host: Proquest

|   |                                                                                                                                                    |
|---|----------------------------------------------------------------------------------------------------------------------------------------------------|
| 1 | ti((posttrauma* near/4 (stress* or disorder* or psych* or symptom*)) OR ab((posttrauma* near/4 (stress* or disorder* or psych* or symptom*)))      |
| 2 | ti((post-trauma* near/4 (stress* or disorder* or psych* or symptom*)) OR ab((post-trauma* near/4 (stress* or disorder* or psych* or symptom*)))    |
| 3 | ti((post trauma* near/4 (stress* or disorder* or psych* or symptom*)) OR ab((post trauma* near/4 (stress* or disorder* or psych* or symptom*)))    |
| 4 | ti((PTSD or acute stress disorder* or combat disorder* or war neuros*)) OR ab((PTSD or acute stress disorder* or combat disorder* or war neuros*)) |
| 5 | ti((((acute or traumatic) near/2 stress*) and (expos* or psyc*)) OR ab((((acute or traumatic) near/2 stress*) and (expos* or psyc*)))              |
| 6 | ti((traumatise#d near/2 (victim* or survivor*)) ) OR ab((traumatise#d near/2 (victim* or survivor*)) )                                             |
| 7 | ti((trauma* near/3 (event* or memor* or flashback* or nightmare*)) ) OR ab((trauma* near/3 (event* or memor* or flashback* or nightmare*)) )       |

|    |                                                                                                                                                                                                                                                                                                      |
|----|------------------------------------------------------------------------------------------------------------------------------------------------------------------------------------------------------------------------------------------------------------------------------------------------------|
| 8  | ti(((trauma* or posttrauma* or post-trauma* or victim* or survivor*) and (exposure near/4 (therap* or psychotherap* or training or counsel*))) ) OR ab(((trauma* or posttrauma* or post-trauma* or victim* or survivor*) and (exposure near/4 (therap* or psychotherap* or training or counsel*))) ) |
| 9  | ti((critical incident near/2 (stress or debrief* or de-brief*))) OR ab((critical incident near/2 (stress or debrief* or de-brief*)))                                                                                                                                                                 |
| 10 | ti((debriefing or de-briefing)) OR ab((debriefing or de-briefing))                                                                                                                                                                                                                                   |
| 11 | ti((crisis intervention* or CISD)) OR ab((crisis intervention* or CISD))                                                                                                                                                                                                                             |
| 12 | ti(((stress or group* or psychological or crisis) near/4 (debrief* or de-brief*))) ) OR ab(((stress or group* or psychological or crisis) near/4 (debrief* or de-brief*))) )                                                                                                                         |
| 13 | ti((trauma* near/3 (event* or memor* or flashback* or nightmare*))) ) OR ab((trauma* near/3 (event* or memor* or flashback* or nightmare*))) )                                                                                                                                                       |
| 14 | ti((EMDR or (eye movement desensitisation and reprocessing))) OR ab((EMDR or (eye movement desensitisation and reprocessing)))                                                                                                                                                                       |
| 15 | ti((EMDR or (eye movement desensitiZation and reprocessing))) OR ab((EMDR or (eye movement desensitiZation and reprocessing)))                                                                                                                                                                       |
| 16 | (s1 or s2 or s3 or s4 or s5 or s6 or s7 or s8 or s9 or s10 or s11 or s12 or s13 or s14 or s15)                                                                                                                                                                                                       |
| 17 | MAINSUBJECT.EXACT("Randomized Clinical Trial")                                                                                                                                                                                                                                                       |
| 18 | ab((randomized or randomised or placebo or randomly))                                                                                                                                                                                                                                                |
| 19 | ti(trial)                                                                                                                                                                                                                                                                                            |
| 20 | (S17 or S18 or S19)                                                                                                                                                                                                                                                                                  |
| 21 | S16 and s20                                                                                                                                                                                                                                                                                          |
| 23 | Publication date: 2018-01-01 - 2019-12-31                                                                                                                                                                                                                                                            |
